# Supplementary material for: Precision synthesis of supported metal nanoparticles: a solid-state chemical approach and the mechanistic understanding
Source: Royal Society of Chemistry journal article supplement (doi:10.1039/d5ta09174h), 2026-01-01
Supplement: d5ta09174h1.pdf [file d5ta09174h1.pdf]

# Supporting Information for “Precision-synthesis of supported metal nanoparticles: a solid-state chemical approach and the mechanistic understanding”

*Jianan Yu,<sup>a†</sup> Tipaporn Patniboon,<sup>a†</sup> Qingfeng Li,<sup>a</sup> Søren Bredmose Simonsen,<sup>a</sup> Thomas Willum Hansen,<sup>b</sup> Pei Liu,<sup>\*c</sup> Heine Anton Hansen,<sup>\*a</sup> and Yang Hu<sup>\*a</sup>*

*<sup>a</sup> Department of Energy Conversion and Storage, Technical University of Denmark, Fysikvej, 2800, Kgs. Lyngby, Denmark*

*<sup>b</sup> DTU Nanolab, Technical University of Denmark, Fysikvej, 2800 Kgs. Lyngby, Denmark*

*<sup>c</sup> Niels Bohr Institute, University of Copenhagen, Blegdamsvej 19, 2100 Copenhagen, Denmark*

*<sup>†</sup> These two authors contributed equally to this work.*

## SUPPLEMENTARY TABLE AND FIGURES

**Table S1.** Characteristic properties of synthesized samples.

| Samples                            | Pt<br>particle<br>size<br><br>(nm) | Pt<br>loading<br><br>(wt. %) | ECSA <sub>exp</sub> ,<br><br>(m <sup>2</sup> g <sub>Pt</sub> <sup>-1</sup> ) | ECSA <sub>actual</sub><br><br>(m <sup>2</sup> g <sub>Pt</sub> <sup>-1</sup> ) | ECSA <sub>theo</sub> ,<br><br>(m <sup>2</sup> g <sub>Pt</sub> <sup>-1</sup> ) | Weight<br>content<br>of<br>particle<br><br>(%) | Number of<br>Pt particles<br>(g <sup>-1</sup> ) | Final<br>particle<br>size<br>(nm) |
|------------------------------------|------------------------------------|------------------------------|------------------------------------------------------------------------------|-------------------------------------------------------------------------------|-------------------------------------------------------------------------------|------------------------------------------------|-------------------------------------------------|-----------------------------------|
| PtN <sub>x</sub> C <sub>y</sub> @C | -                                  | 9.2                          | -                                                                            | -                                                                             | -                                                                             | 0                                              | -                                               |                                   |
| H <sub>2</sub> -600                | 1.2±0.2                            | 10.9                         | 16.1                                                                         | 23.4                                                                          | 230.8                                                                         | 10.1                                           | 5.65×10 <sup>17</sup>                           | 2.6                               |
| H <sub>2</sub> -675                | 1.7±0.3                            | 11.9                         | 37.2                                                                         | 54.1                                                                          | 164.1                                                                         | 33.0                                           | 6.61×10 <sup>17</sup>                           | 2.5                               |
| H <sub>2</sub> -700                | 2.1±0.2                            | 12.0                         | 40.3                                                                         | 58.6                                                                          | 131.3                                                                         | 44.6                                           | 4.66×10 <sup>17</sup>                           | 2.8                               |
| H <sub>2</sub> -750                | 2.6±0.4                            | 12.4                         | 56.6                                                                         | 82.4                                                                          | 108.8                                                                         | 75.7                                           | 4.48×10 <sup>17</sup>                           | 2.8                               |
| H <sub>2</sub> -850                | 2.7±0.4                            | 13.5                         | 70.1                                                                         | 101.9                                                                         | 102.8                                                                         | 99.2                                           | 5.03×10 <sup>17</sup>                           | 2.7                               |
| JM Pt/C                            | 3.2±0.5                            | 20.5                         | 59.4                                                                         | 86.3                                                                          | 86.3                                                                          | 100                                            | --                                              |                                   |

**Table S2.** Element contents of synthesized Pt-based samples.

| Samples                            | N, determined by<br>XPS | N, determined by SEM-EDS |         | Pt, determined by<br>SEM-EDS |
|------------------------------------|-------------------------|--------------------------|---------|------------------------------|
|                                    | (at. %)                 | (at. %)                  | (wt. %) | (wt. %)                      |
| PtN <sub>x</sub> C <sub>y</sub> @C | 10.4                    | 12.1                     | 12.6    | 9.2                          |
| H <sub>2</sub> -600                | 9.0                     | 7.9                      | 8.0     | 10.9                         |
| H <sub>2</sub> -675                | 6.1                     | 4.7                      | 4.9     | 11.9                         |
| H <sub>2</sub> -700                | 4.1                     | 3.8                      | 3.7     | 12.0                         |
| H <sub>2</sub> -750                | 2.5                     | 2.2                      | 2.1     | 12.4                         |
| H <sub>2</sub> -850                | 1.3                     | 1.5                      | 1.5     | 13.5                         |

**Table S3.** Calculated atomic ratio of N/Pt<sub>SS</sub> in synthesized samples.

| Samples                            | Pt content | N content | Percentage of Pt<br>single sites | N/Pt <sub>SS</sub> |
|------------------------------------|------------|-----------|----------------------------------|--------------------|
|                                    | (at. %)    | (at. %)   | (%)                              | atomic ratio       |
| PtN <sub>x</sub> C <sub>y</sub> @C | 0.6        | 12.1      | 100.0                            | -                  |
| H <sub>2</sub> -600                | 0.7        | 7.9       | 89.9                             | 12.4               |
| H <sub>2</sub> -675                | 0.7        | 4.7       | 67.0                             | 9.5                |
| H <sub>2</sub> -700                | 0.9        | 3.8       | 55.4                             | 8.0                |
| H <sub>2</sub> -750                | 0.9        | 2.2       | 24.3                             | 10.5               |
| H <sub>2</sub> -850                | 0.9        | 1.5       | -                                | -                  |

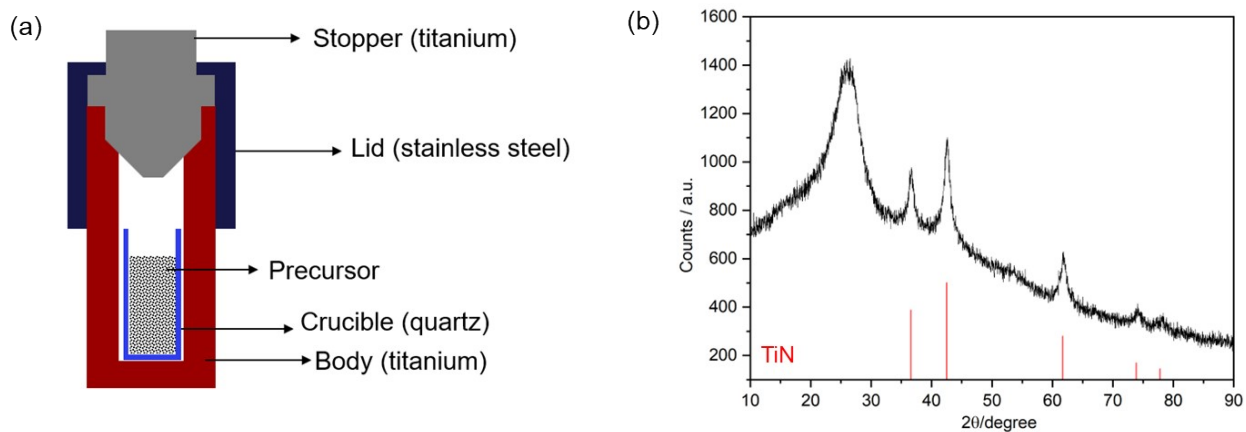

**Figure S1.** (a) Schematic illustration of the Ti autoclave. (b) XRD pattern of the sample directly attached to the inner wall of the Ti autoclave after the synthesis at 800 °C, which reveals the presence of TiN (JCPDS: 65-5759).

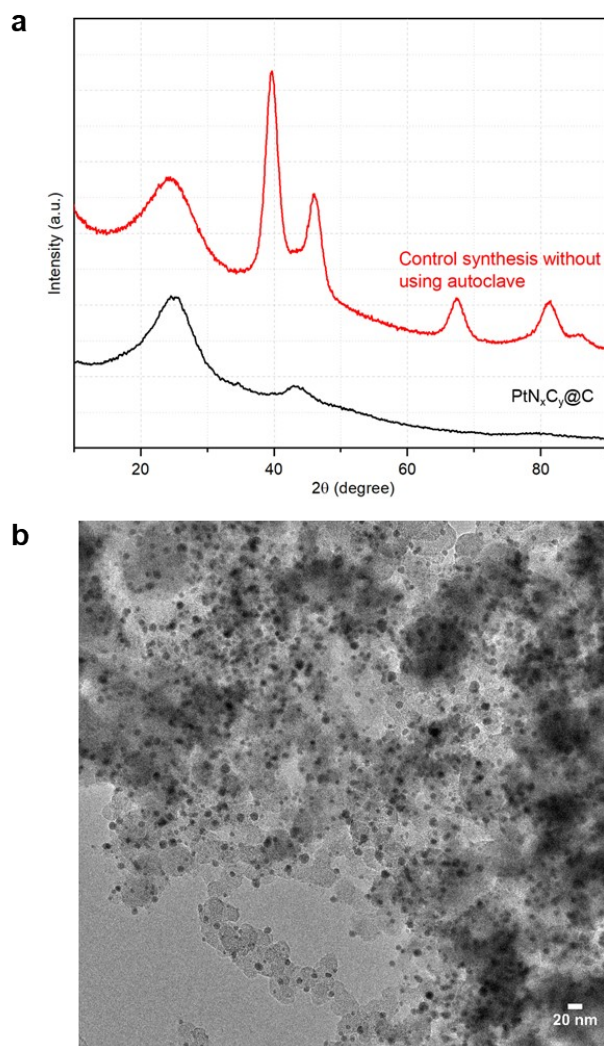

**Figure S2.** (a) XRD pattern of PtN<sub>x</sub>C<sub>y</sub>@C in comparison to that of the sample synthesized without using the autoclave. (b) TEM images of Pd nanoparticles supported on Vulcan 72R carbon black, synthesized without using the autoclave for the first step.

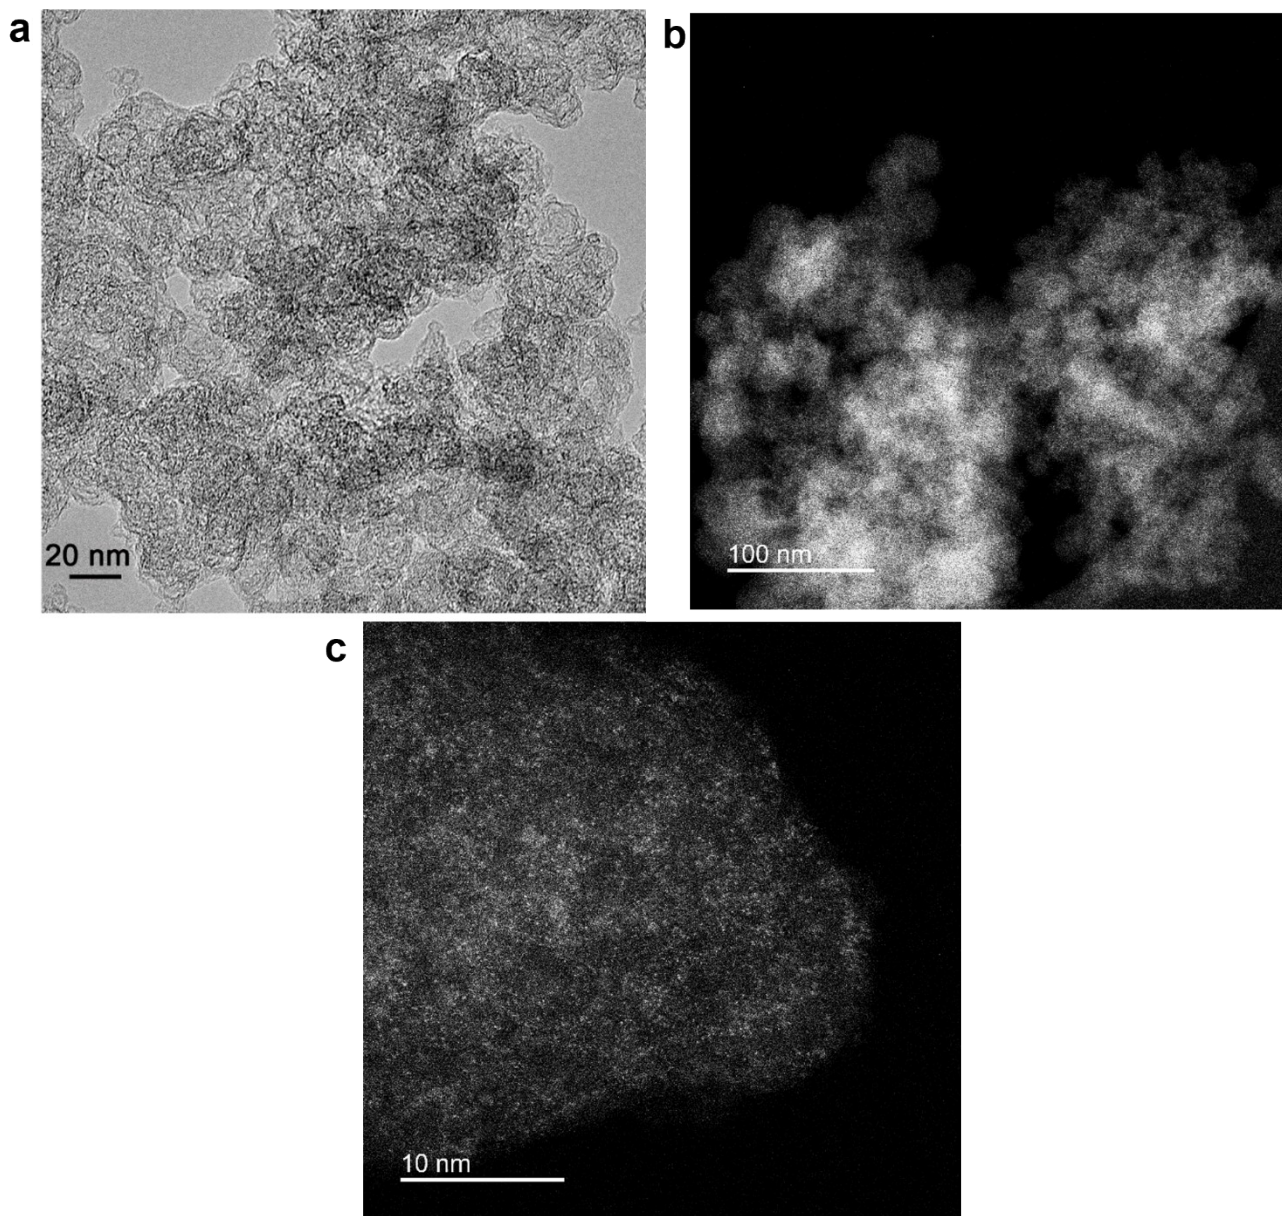

**Figure S3.** (a)TEM and (b,c) HAADF-STEM images of  $\text{PtN}_x\text{C}_y@\text{C}$ , which reveal the uniform distribution of single  $\text{PtN}_x\text{C}_y@\text{C}$ .

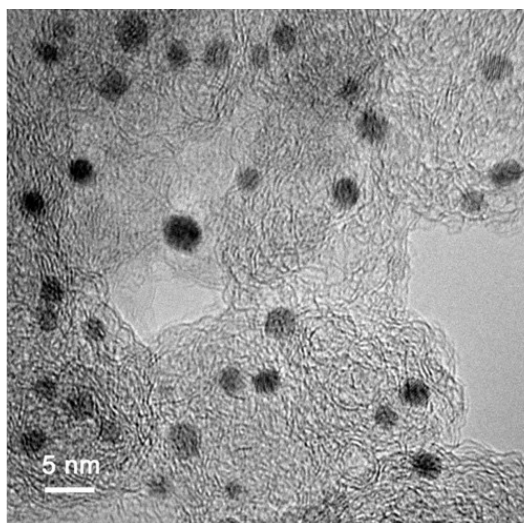

**Figure S4.** TEM image of H<sub>2</sub>-850 sample, showing the formation of uniform Pt nanoparticles.



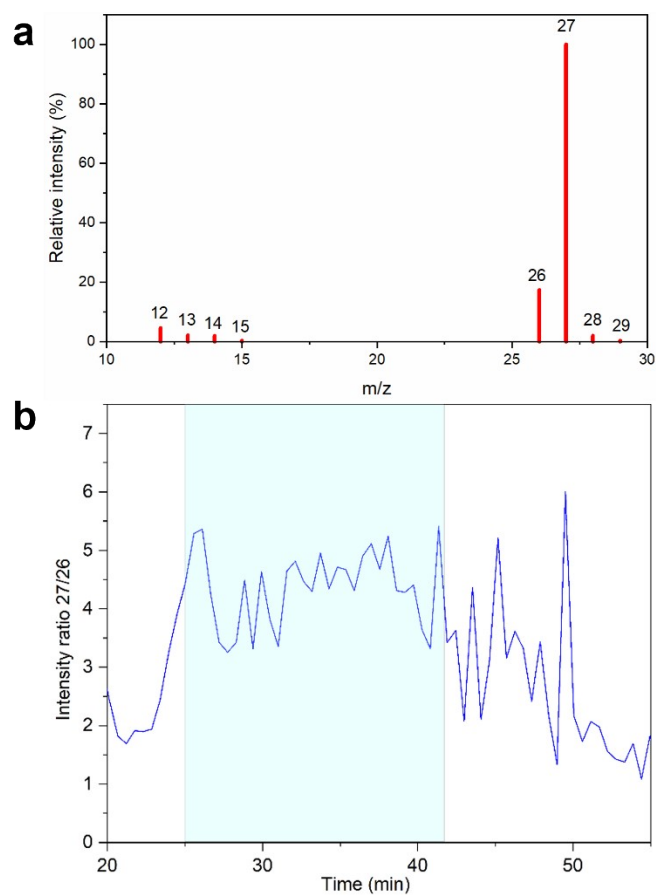

**Figure S5.** (a) Reference MS data of HCN from NIST Mass Spectrometry Data Center; (b) The intensity ratio of m/z 27 to m/z 26 throughout the process. The highlighted region indicates the time period with a significant amount of evolved gaseous products detected, same as that highlighted in Figure 2c.

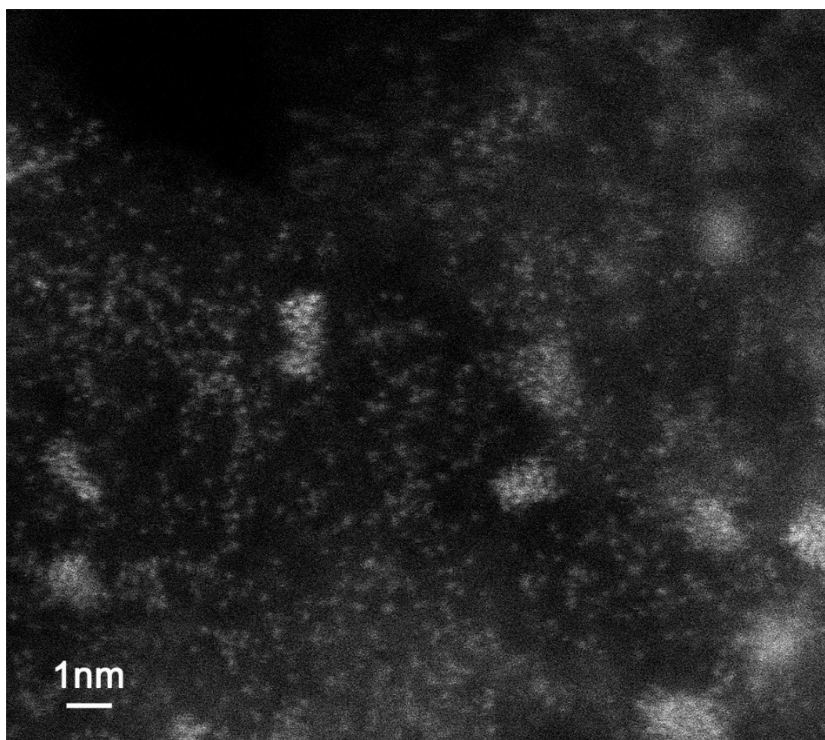

**Figure S6.** HAADF-STEM image of H<sub>2</sub>-600, which reveals the disordered structures of the formed Pt nanoclusters.

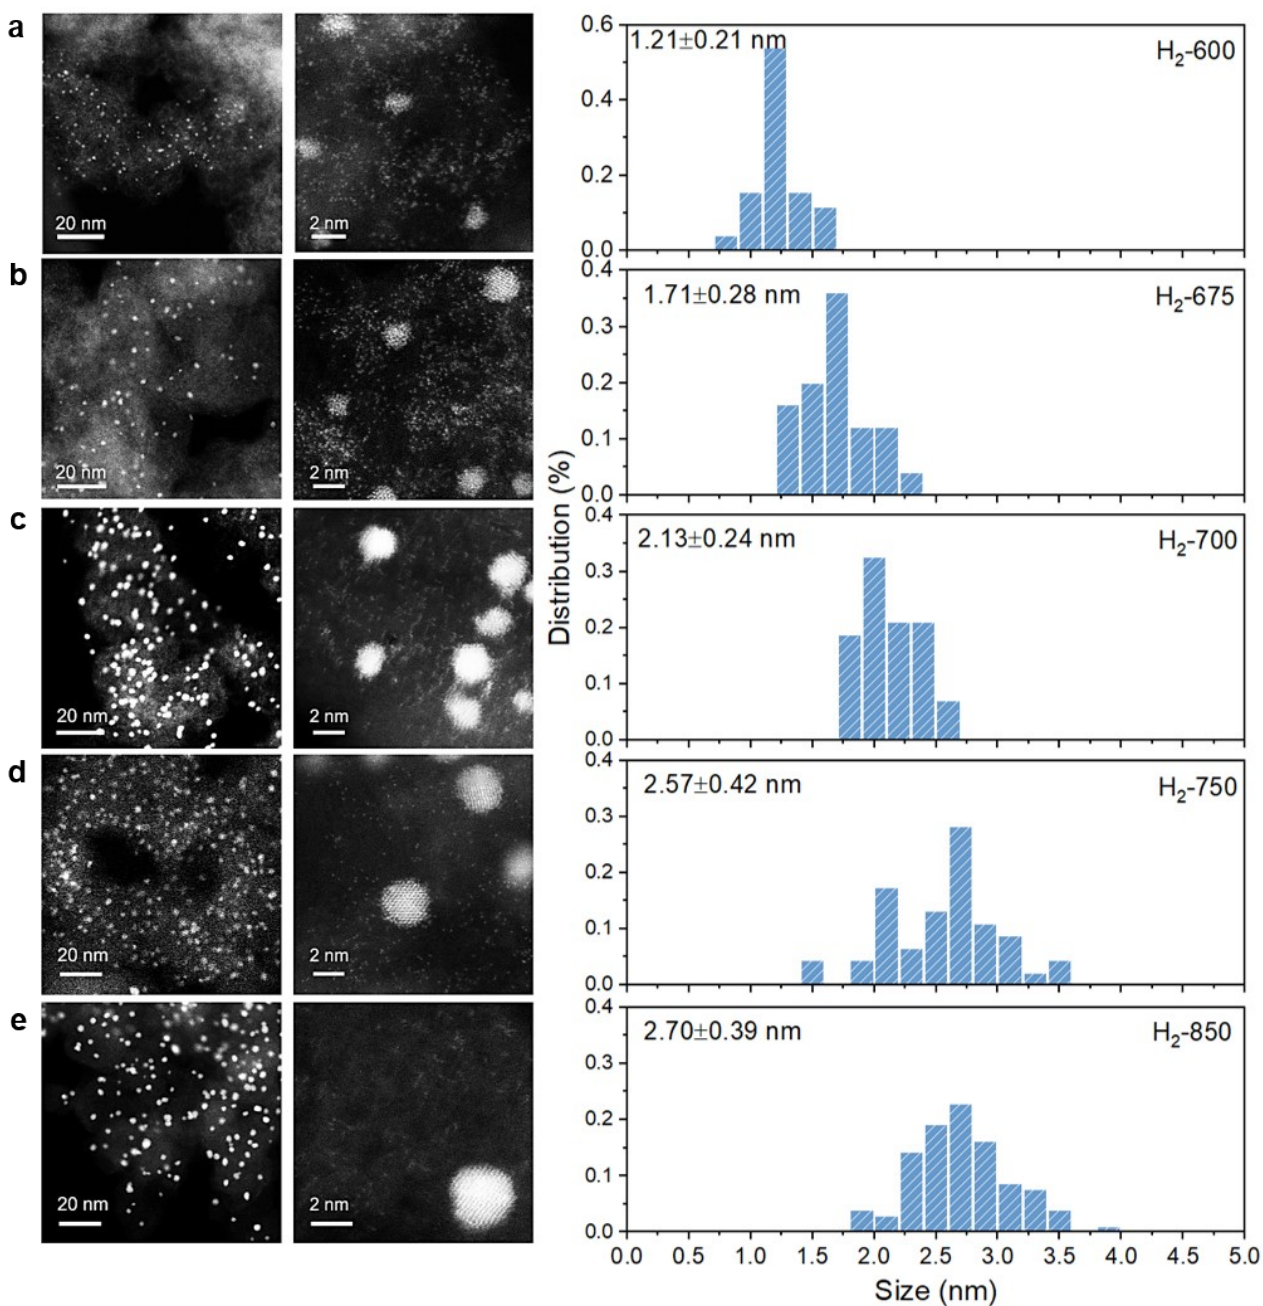

**Figure S7.** HAADF-STEM images of the series of samples synthesized at different reduction temperatures (left panels) and the corresponding histograms of the Pt particles (right panel), including (a) H<sub>2</sub>-600, (b) H<sub>2</sub>-675, (c) H<sub>2</sub>-700, (d) H<sub>2</sub>-750, and (e) H<sub>2</sub>-850.

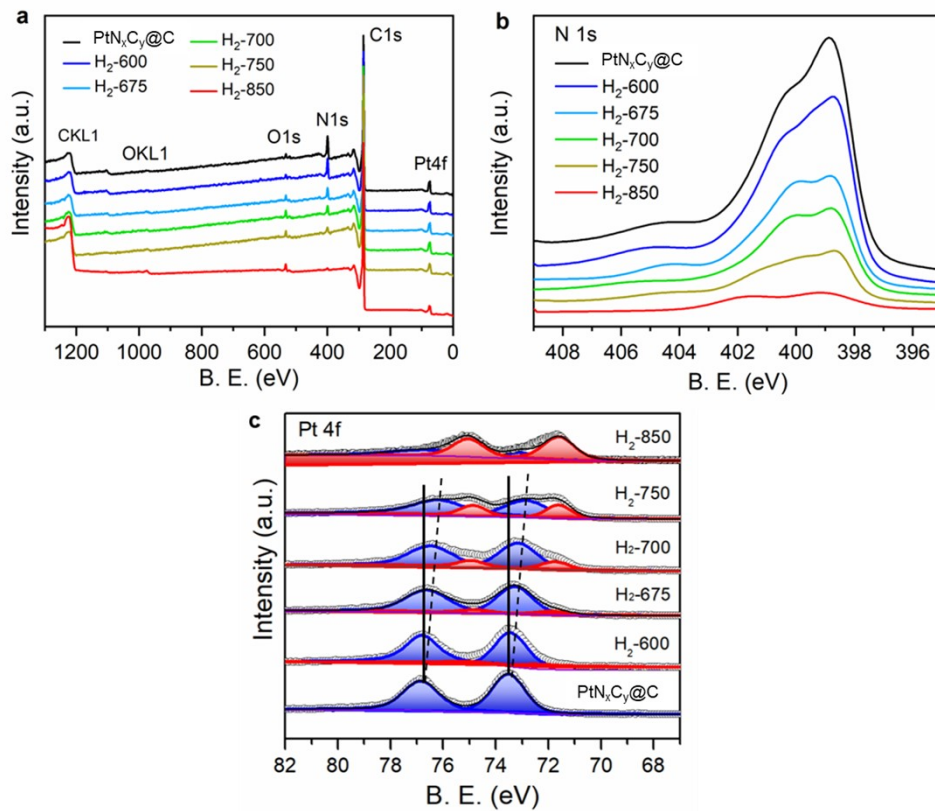

**Figure S8.** (a) XPS survey spectra, (b) narrow-scan N 1s spectra, and (c) narrow-scan Pt 4f spectra of the samples synthesized at different reduction temperatures.

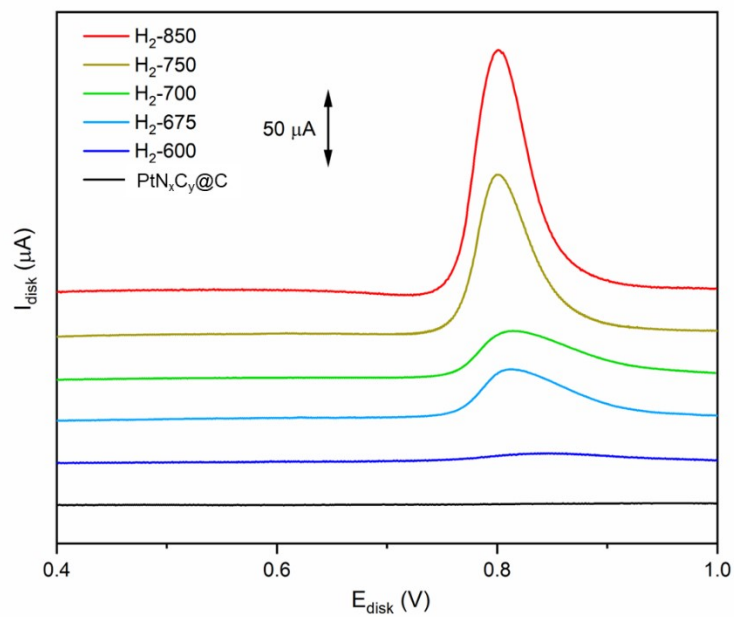

**Figure S9.** Normalized CO stripping peaks of the  $\text{PtN}_x\text{C}_y@\text{sample}$  and the series of samples synthesized at different reduction temperatures.

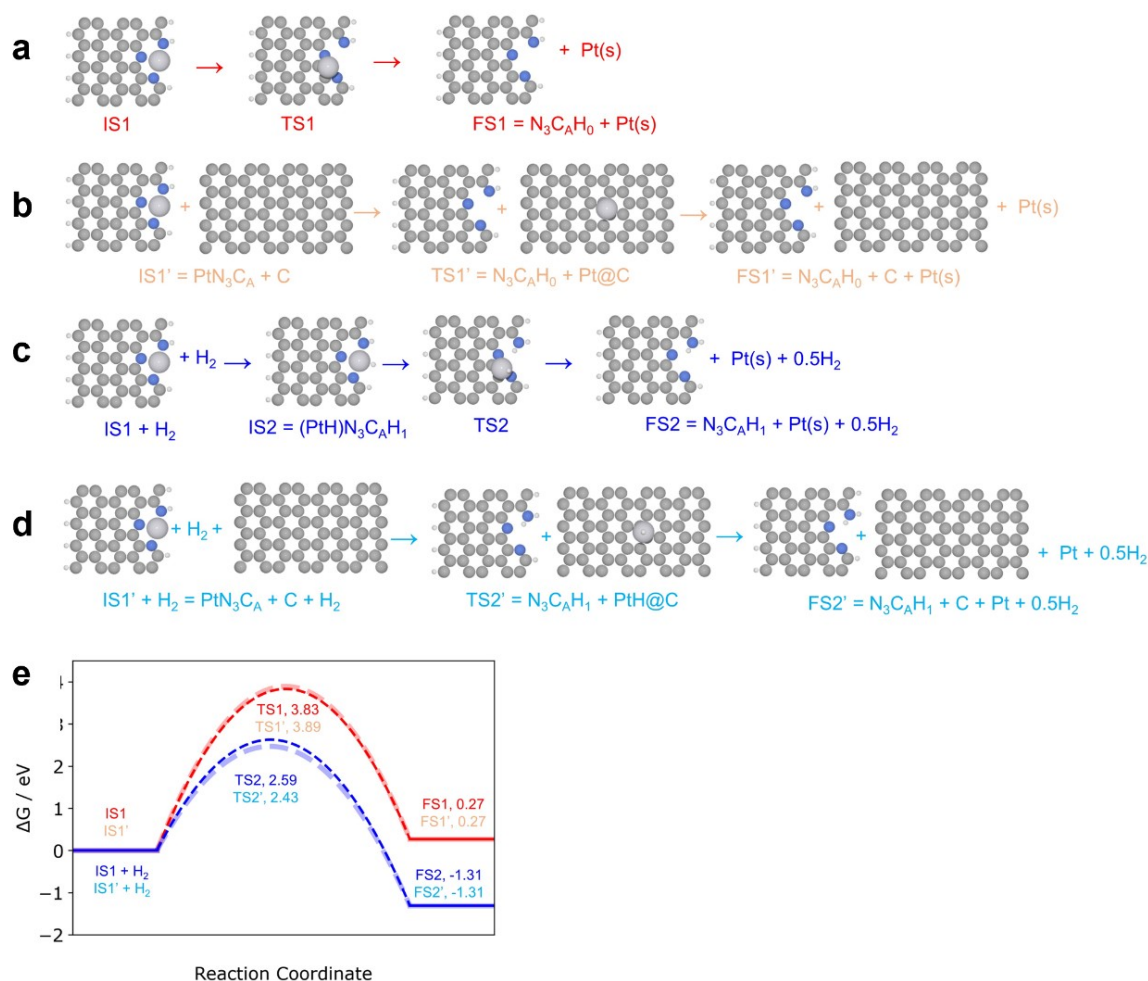

**Figure S10.** Stability of  $PtN_xC_y$  structures with and without  $H_2$  at  $T = 675\text{ }^\circ\text{C}$  and  $p(H_2) = 0.05\text{ bar}$ . Atomic structures illustrating the detachment of the Pt atom from the  $PtN_3C_A$  structure without  $H_2$  (a) TS1 from the NEB calculation and (b) TS1' from the approximation described in SI. The detachment processes with  $H_2$  using (c) TS2 from the NEB calculation and (d) TS2' from the approximation. (e) Energy profiles for the detachment process with and without  $H_2$  from the NEB calculation and the approximation. Colors of atoms: C = dark gray, Pt = light grey, N = blue, and H = white. Figure S10(a) shows the atomic structures for Pt atom detached from the  $PtN_3C_A$

structure without H<sub>2</sub>. TS1 was obtained from the CI-NEB calculation, and  $\Delta E_a(\text{TS1})$ , which is the energy barrier obtained from the NEB calculation, can be calculated as

$$\Delta E_a(\text{TS1}) = E(\text{TS1}) - E(\text{IS1}) = E(\text{TS1}) - E(\text{PtN}_3\text{C}_A) = 3.83 \text{ eV}$$

where  $E(\text{TS1})$  is the total energy of TS1 obtained from the NEB calculation.  $E(\text{IS1}) = E(\text{PtN}_3\text{C}_A)$  is the total energy of the  $\text{PtN}_3\text{C}_A$  structure. Figure S10b) shows the atomic structures for approximating the energy barrier of the same process. TS1' is the approximated structure for the transition state, and the approximated energy barrier is calculated as follows

$$\Delta E_a(\text{TS1}') = E(\text{N}_3\text{C}_A\text{H}_0) + E(\text{Pt@C}) - E(\text{C}) - E(\text{PtN}_3\text{C}_A) = 3.89 \text{ eV}$$

where  $E(\text{N}_3\text{C}_A\text{H}_0)$  is the total energy of the carbon cavity structure with 0 H atom binding at the carbon cavity.  $E(\text{Pt@C})$  is the total energy of the isolated Pt atom on the (undoped) carbon surface, and  $E(\text{C})$  is the total energy of the (undoped) carbon surface. From the energy profiles for the detachment process without H<sub>2</sub>, as shown in Figure S10(e), it can be seen that  $\Delta E_a(\text{TS1}) \approx \Delta E_a(\text{TS1}')$ . The reaction free energy of the detachment without H<sub>2</sub> in both Figure S10(a) and S10(b) can be written as follows

$$\Delta G_R = E(\text{Pt}) + E(\text{N}_3\text{C}_A\text{H}_0) - E(\text{PtN}_3\text{C}_A)$$

where  $E(\text{Pt})$  is the energy per atom of the Pt in the FCC structure

Similarly, Figure S10(c) shows the atomic structures for the single Pt atom detached from the  $\text{PtN}_3\text{C}_A$  structure in the presence of H<sub>2</sub>. TS2 was obtained from a CI-NEB calculation, and  $\Delta G_a(\text{TS2})$ , which is the kinetic free energy barrier obtained from the NEB calculation, can be calculated as

$$\begin{aligned} \Delta G_a(\text{TS2}) &= [E(\text{TS2}) - E(\text{IS2})] + [G(\text{IS2}) - E(\text{IS1}) - G(\text{H}_2)] \\ &= [E(\text{TS2}) - E((\text{PtH})\text{N}_3\text{C}_A\text{H}_1)] + [G(\text{PtH})\text{N}_3\text{C}_A\text{H}_1 - E(\text{PtN}_3\text{C}_A) - G(\text{H}_2)] \\ &= 2.35 \text{ eV} \end{aligned}$$

where  $E(\text{TS2})$  is the total energy of TS2 obtained from the NEB calculation.  $E(\text{IS2}) = E((\text{PtH})\text{N}_3\text{C}_A\text{H}_1)$  is the total energy of the  $(\text{PtH})\text{N}_3\text{C}_A\text{H}_1$  structure.  $G(\text{IS2}) = G((\text{PtH})\text{N}_3\text{C}_A\text{H}_1)$  is total free energy of the  $(\text{PtH})\text{N}_3\text{C}_A\text{H}_1$  structure ( $G = E + \text{ZPE} + U_{\text{vib}} - TS_{\text{vib}}$ ).  $G(\text{H}_2)$  is the total free energy of a H<sub>2</sub> gas molecule ( $G = E + \text{ZPE} + H - TS$ ). Figure S10(d) shows the atomic structures for approximating the energy barrier of the same process in the presence of H<sub>2</sub>. TS2' is the approximated structure for the transition state and the approximated energy barrier is calculated as follows

$$\begin{aligned} \Delta G_a(\text{TS2}') &= [G(\text{N}_3\text{C}_A\text{H}_1) + G(\text{PtH@C}) - G((\text{PtH})\text{N}_3\text{C}_A\text{H}_1)] + [G((\text{PtH})\text{N}_3\text{C}_A\text{H}_1) - G(\text{H}_2) - E(\text{C}) - E(\text{PtN}_3\text{C}_F)] \\ &= G(\text{N}_3\text{C}_A\text{H}_1) + G(\text{PtH@C}) - G(\text{H}_2) - E(\text{C}) - E(\text{PtN}_3\text{C}_A) \\ &= 2.19 \text{ eV} \end{aligned}$$

where  $G(N_3C_AH_1)$  is the total free energy of the total energy of the carbon cavity structure with one H atom.  $G(PtH@C)$  is the total free energy of the isolated Pt atom with 1H adsorbate on the carbon surface. We also find  $\Delta G_a(TS2) \approx \Delta G_a(TS2')$  for the detachment with  $H_2$ . The reaction free energy of the detachment with  $H_2$  in both Figure S10(c) and S10(d) can be written as follows.

$$\begin{aligned}\Delta G_R &= E(Pt) + G(N_3C_AH_1) + 0.5 G(H_2) - E(PtN_3C_A) - G(H_2) \\ &= E(Pt) + G(N_3C_AH_1) - E(PtN_3C_A) - 0.5G(H_2)\end{aligned}$$

We can approximate the kinetic barrier for the detachment with and without  $H_2$  by considering the thermodynamic energy difference. For the other considered  $PtN_xC_y$  structures in Figure S13, the energy barriers for the detachment with and without  $H_2$  are approximated from the following thermodynamic calculations.

The approximated energy barrier for the detachments of a single Pt atom from the  $PtN_xC_y$  site without  $H_2$  ( $n = 0$  where  $n$  is the number of H atoms binding at the carbon cavity structure) can be generally written as

$$\Delta G_a(n=0) = E(N_xCH_{n=0}) + E(Pt@C) - E(C) - E(PtN_xC) + \Delta TS_{diffuse}$$

The approximated energy barrier for the detachment of a single Pt atom from the  $PtN_xC$  site with  $H_2$  can be generally written as follows ( $n > 0$  where  $n$  is the number of H atoms binding at the carbon cavity structure).

$$\Delta G_a(n>0) = G(N_xCH_{n>0}) + G(PtH@C) - 0.5(n+1)G(H_2) - E(C) - E(PtN_xC) + \Delta TS_{diffuse}$$

where  $\Delta TS_{diffuse}$  ( $= 0.15$  eV) and  $\Delta TS_{diffuseH}$  ( $= 0.08$  eV) is the diffusion energy barrier for the isolated Pt atom and isolated Pt atom with one H adsorbate on the carbon surface. We include the diffusion barrier for the isolated PtH (Pt) on the carbon surface in the approximated energy barrier as we consider that the isolated Pt atom after the detachment is possibly on a carbon surface, diffusing around and agglomerating to form a Pt cluster. The N-dopant atoms and defects on the carbon surface can affect the diffusion energy barrier of the isolated Pt (PtH) atom (possibly increasing the energy barrier). The calculated energies reported here are a lower limit for the energy barrier.

The half-life ( $t_{1/2}$  in s unit) for the  $PtN_xC$  site can be approximated as follows

$$k = (k_B T / h) \exp(\Delta G_a(n > 0) / k_B T) \text{ and } t_{1/2} = k^{-1}$$

where  $k_B$  is the Boltzmann's constant (in eV/K),  $h$  is Planck's constant (in eV s), and  $T$  is the temperature (in K). While the  $t_{1/2}$  gives information about the rate of the detachment, the reaction free energy for the detachment tells whether the detachment is thermodynamically favorable, and it can be generally calculated as follows ( $n$  is the number of H atoms binding at the carbon cavity structure).

$$\Delta G_R(n \geq 0) = E(Pt) + G(N_xCH_{n \geq 0}) - E(PtN_xC) - 0.5nG(H_2); n \geq 0$$

where  $E(Pt)$  is the energy per atom of the Pt in its FCC structure, and due to the cohesion energy in its bulk structure, the calculated energies reported here are a lower limit for the free reaction energy of nanoparticle formation.



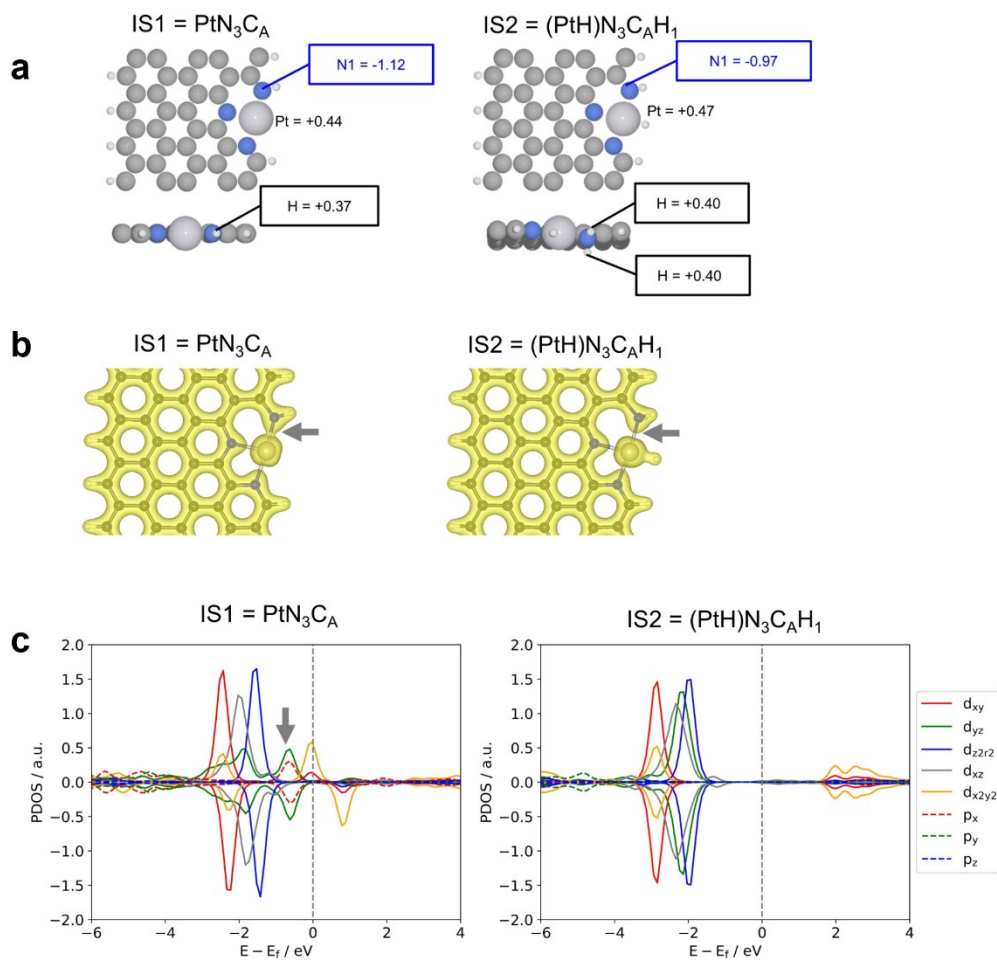

**Figure S11:** The detachment of a single Pt atom from the PtN<sub>3</sub>C<sub>A</sub> structure. (a) Atomic structure and Bader charge <sup>1</sup> on atoms, (b) isosurface charge density (at isosurface level = 0.12 electron/Å<sup>3</sup>), and (c) project density of states (PDOS) on the Pt atom (d-orbitals in solid lines), and N1 atom (p-orbitals in dashed lines) in IS1 = PtN<sub>3</sub>C<sub>A</sub> and IS2 = (PtH)N<sub>3</sub>C<sub>Z</sub>H<sub>1</sub> structure. Colors of atoms: C = dark gray, Pt = light grey, N = blue, and H = white.

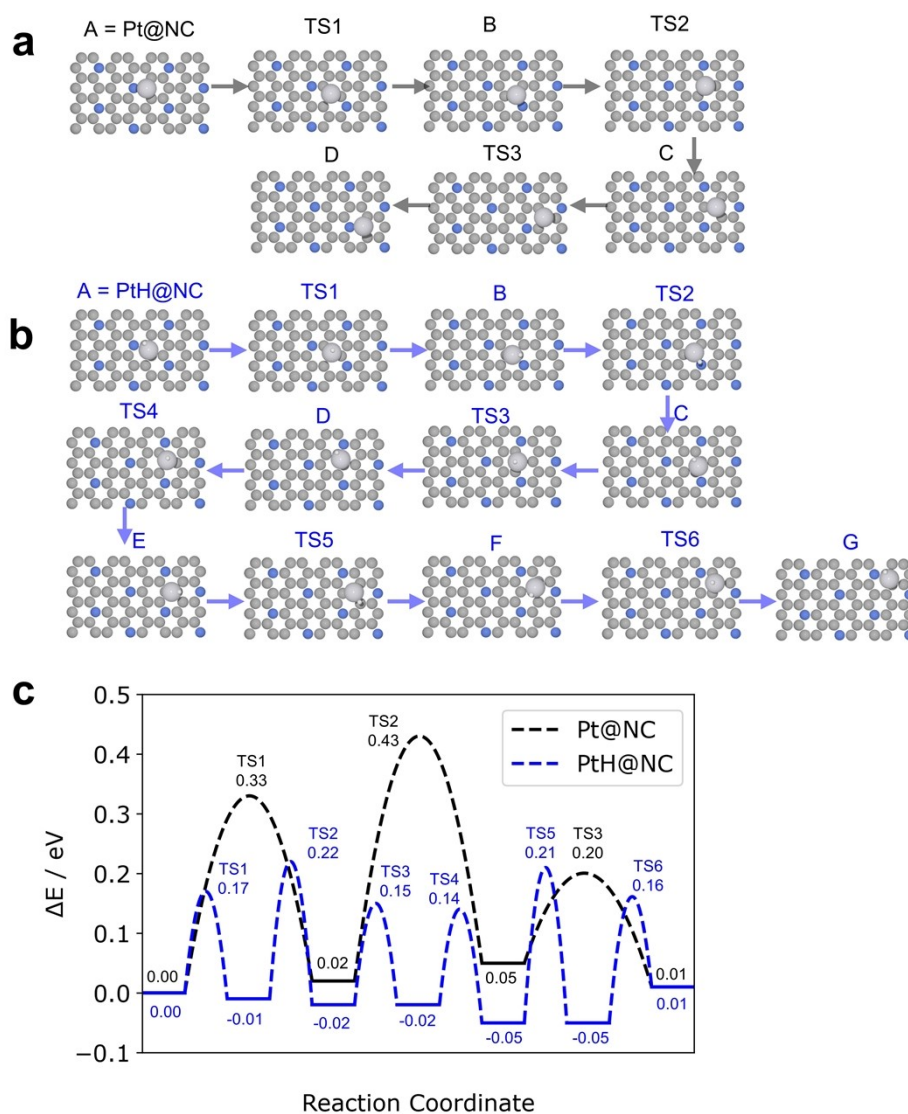

**Figure S12.** The diffusion of an isolated Pt atom on an N-doped carbon surface. Atomic structures illustrating the diffusion of (a) the isolated Pt atom and (b) the isolated Pt atom with an H adsorbate (PtH) on an N-doped carbon surface. (c) Energy profiles for the diffusion of the Pt@C (black line) and the PtH@C (blue line) on the N-doped carbon surface. Colors of atoms: C = dark gray, Pt = light grey, N = blue, and H = white.

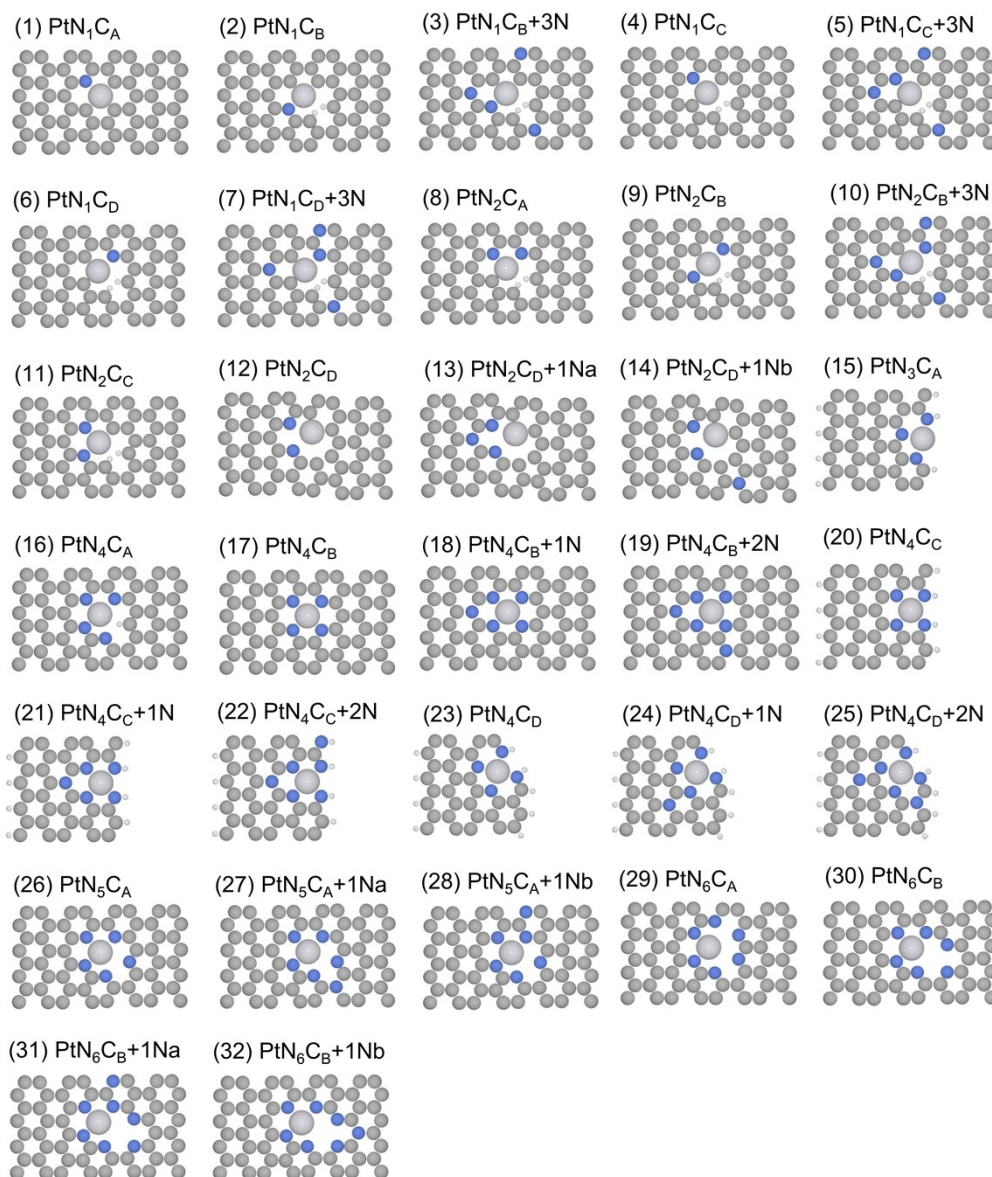

**Figure S13.** Structural models of  $\text{PtN}_x\text{C}_y$  considered in this study. Different  $\text{PtN}_x\text{C}_y$  motifs on the carbon surfaces are considered, where  $x$  denotes the number of N atoms coordinated with a single Pt atom in the  $\text{PtN}_x$  motifs ( $x = 1-6$ ) and  $y$  denotes the different carbon surface ( $y = \text{A, B, C, D}$ ).  $\text{PtN}_x\text{C}_y+z\text{N}$  denotes  $\text{PtN}_x\text{C}_y$  motifs with  $z$  graphitic N atom around the motif. Colors of atoms: C = dark gray, Pt = light grey, N = blue, and H = white. Other possible Pt-N-C structures in the synthesized Pt-N-C@C sample that can transform into a Pt cluster need to satisfy two criteria: 1)

The Pt-N-C structures are thermodynamically stable under the synthesis condition (without H<sub>2</sub>), and 2) they are thermodynamically unstable under the H<sub>2</sub> exposure. The detachment of the Pt atom from the Pt-N-C structures is considered at T = 675 °C and p(H<sub>2</sub>) = 0.05 bar. Different PtN<sub>x</sub>C motifs on the carbon surface are considered (where x is the number of N atoms coordinated with a single Pt atom in the PtN<sub>x</sub>C motifs). We also include the effect of graphitic N doping around the coordinated site. Thus, the total amount of N (coordinated + doping) varies from 1.6% to 12.8% atomic concentration, which is approximated in the concentration range of N content in the synthesized Pt-N-C@C sample.

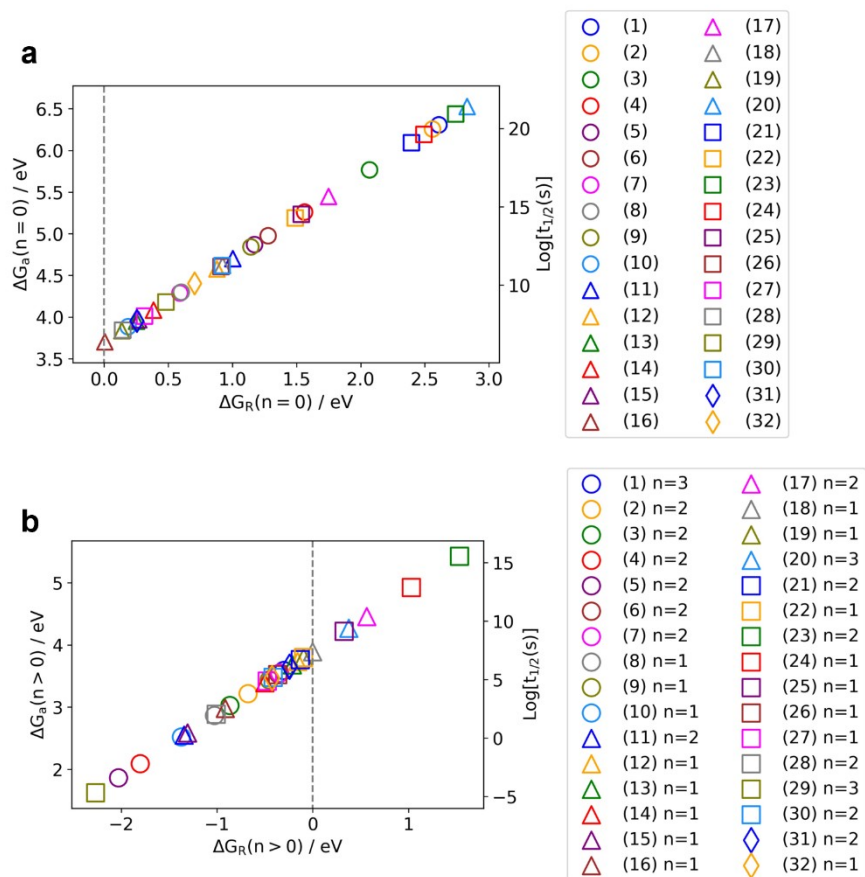

**Figure S14.** (a)  $\Delta G_R(n=0)$  vs.  $\Delta G_a(n=0)$  for detachment of a Pt atom from a  $\text{PtN}_x\text{C}_y$  structure without  $\text{H}_2$ . (b)  $\Delta G_R(n > 0)$  vs.  $\Delta G_a(n > 0)$  for detachment of Pt atom from a  $\text{PtN}_x\text{C}_y$  structure in the presence of  $\text{H}_2$  at  $T = 675^\circ\text{C}$  and  $p(\text{H}_2) = 0.05$  bar. In Figure S15(b),  $n$  is the number of H atoms binding at the carbon cavity after removing the single Pt atom. Figure S15(b) shows only the  $n$  value that makes  $\Delta G_R(n > 0)$  most thermodynamically favorable for each  $\text{PtN}_x\text{C}_y$  structure. The considered structural models of the Pt-N-C structures are depicted in Figure S13.

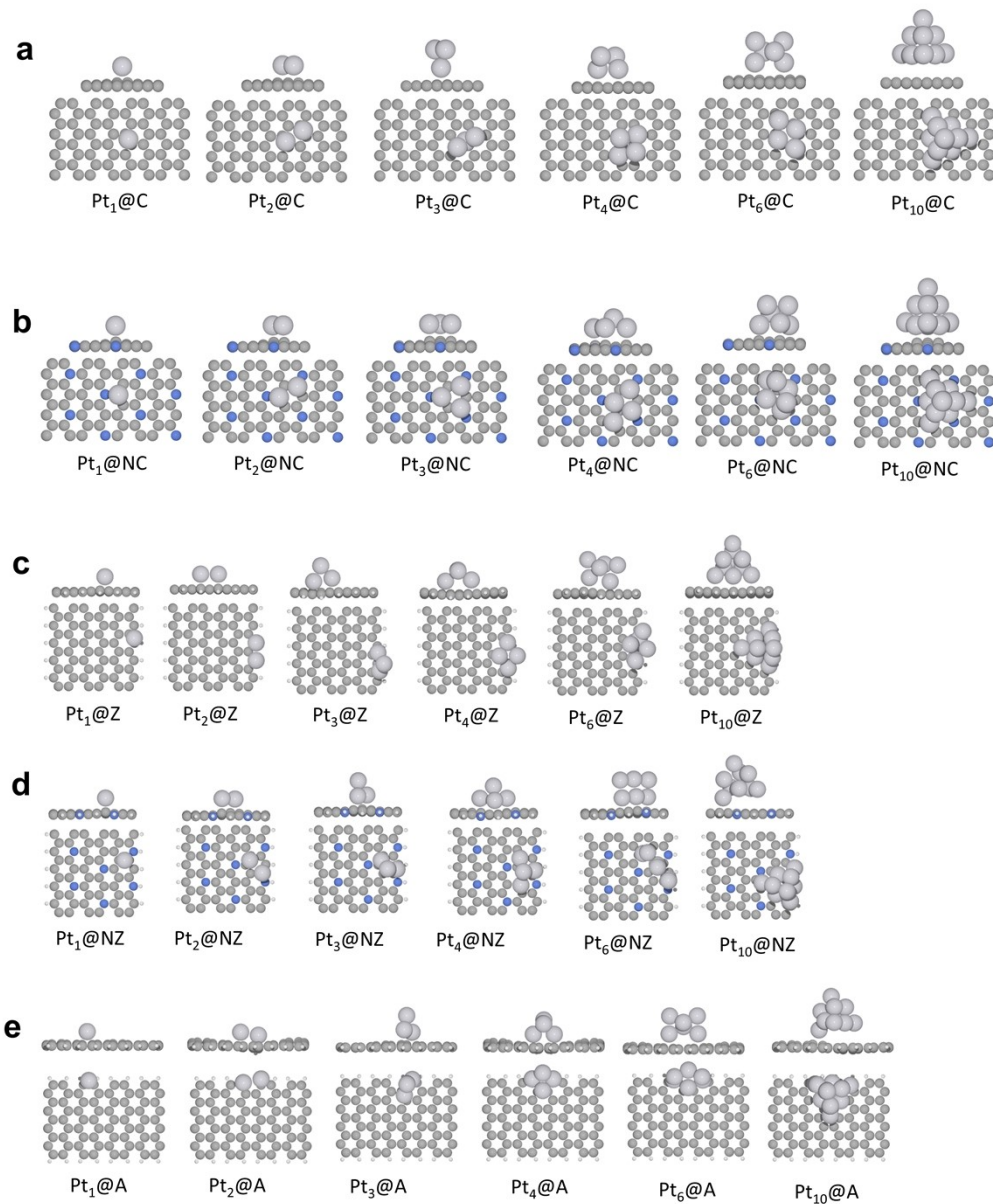

**Figure S15.** Nucleation of Pt clusters on different carbon surfaces. Atomic structures of  $Pt_m@X$  on: (a) C = undoped carbon surface, (b) NC = N-doped carbon surface, (c) Z = zigzag edge, (d) NZ = N-doped zigzag edge, (e) A = armchair edged. Color for atom: C = dark gray, Pt = light grey, N = blue, and H = white.



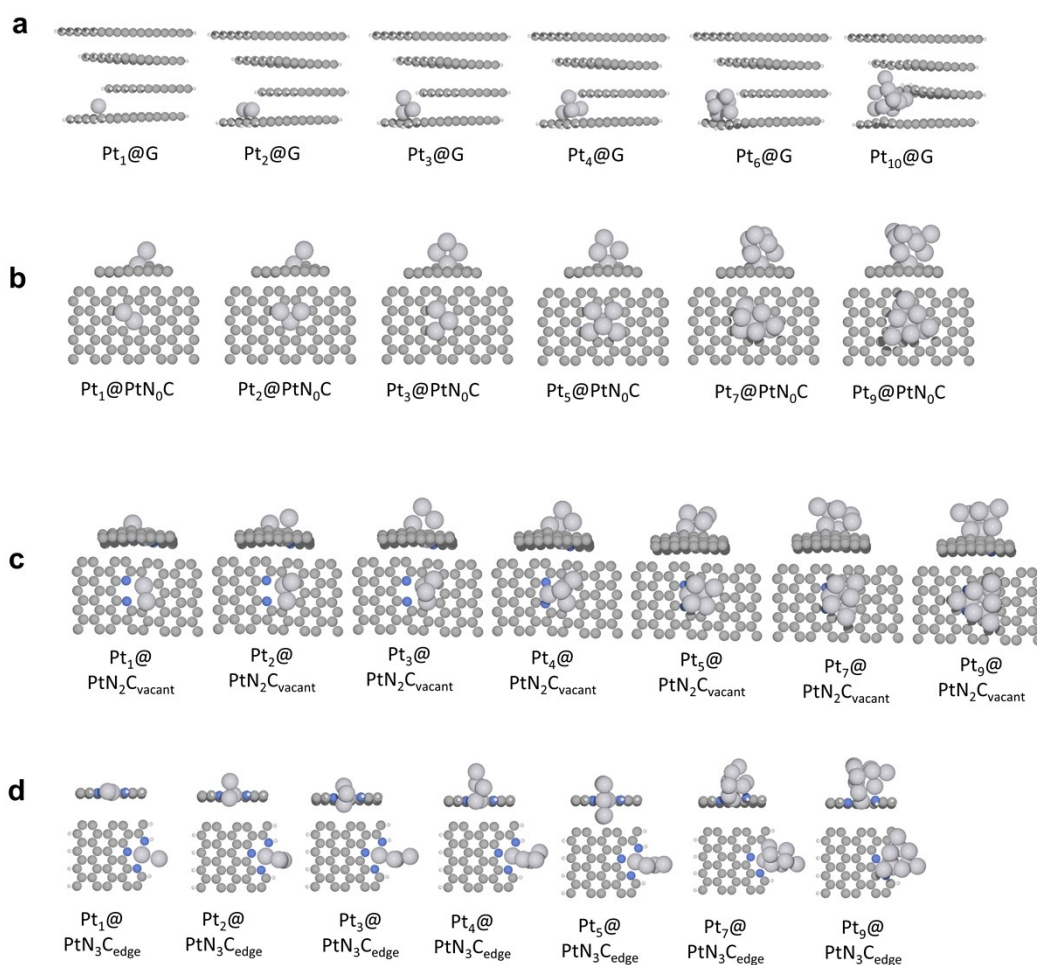

**Figure S16.** Nucleation of Pt clusters on different carbon surfaces. Atomic structure of Pt<sub>m</sub>@X on: (a) G = graphite edge, (b) PtN<sub>0</sub>C, (c) PtN<sub>2</sub>C<sub>vacant</sub> and (d) PtN<sub>3</sub>C<sub>edge</sub>, (e) A = armchair edged. Color for atom: C = dark gray, Pt = light grey, N = blue, and H = white.

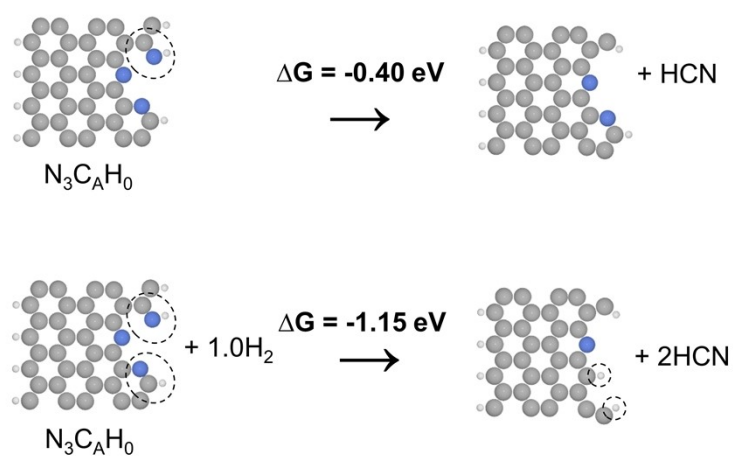

**Figure S17.** Formation of HCN. (a) Atomic structures illustrating possible formation pathways of HCN and corresponding reaction free energy at  $T=675^\circ\text{C}$ ,  $p(\text{H}_2)=0.05 \text{ bar}$ , and  $p(\text{HCN})=1 \text{ mbar}$ .



## REFERENCES

1. W. Tang, E. Sanville and G. Henkelman, *Journal of Physics: Condensed Matter*, 2009, **21**, 084204.
